# Supplementary material
Source: PubMed Central journal article supplement (PMC5415409)

**a**

**2F, top panel**

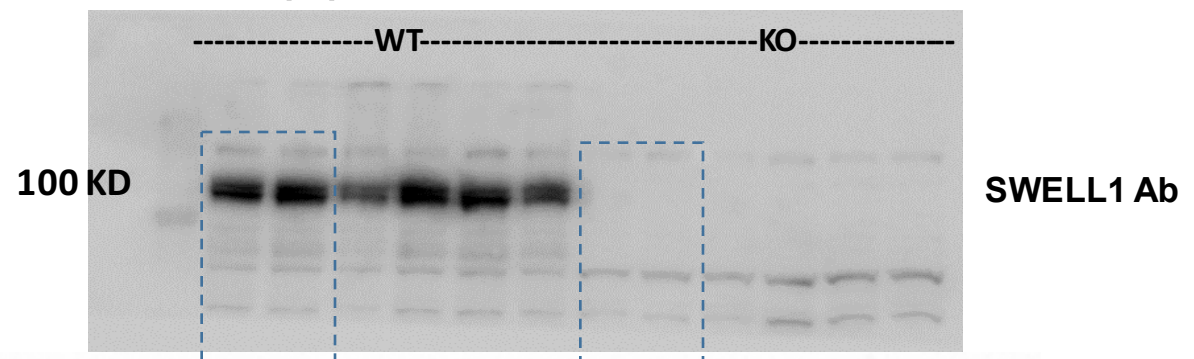

100 KD

SWELL1 Ab

45 KD

$\beta$  actin

**bottom panel**

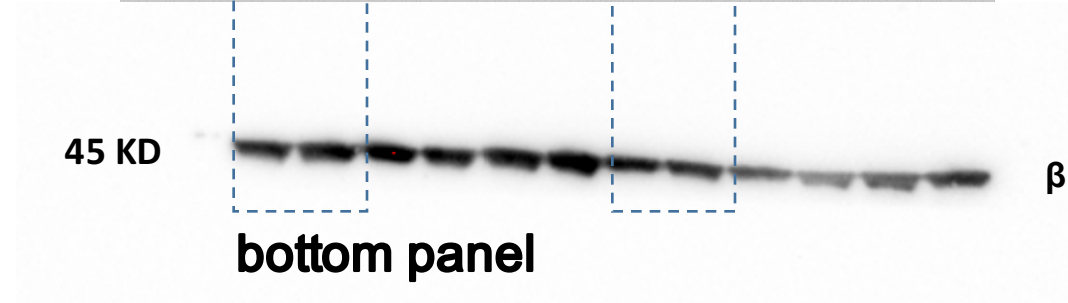

**b 4E**

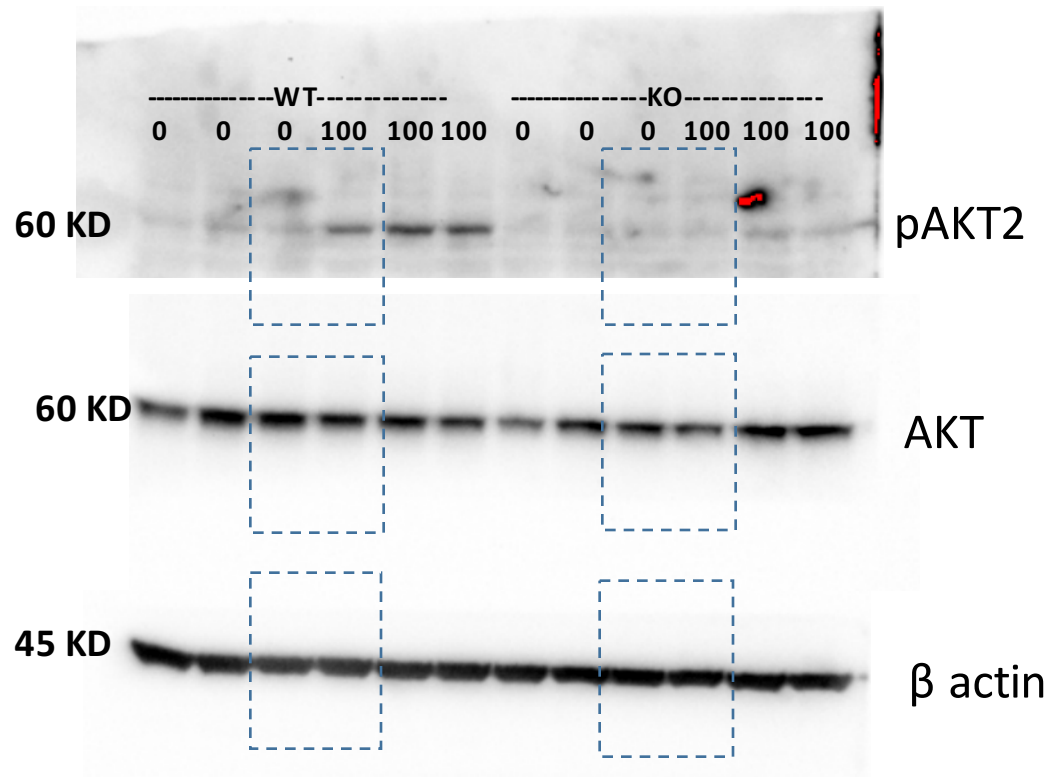

**C** 4E

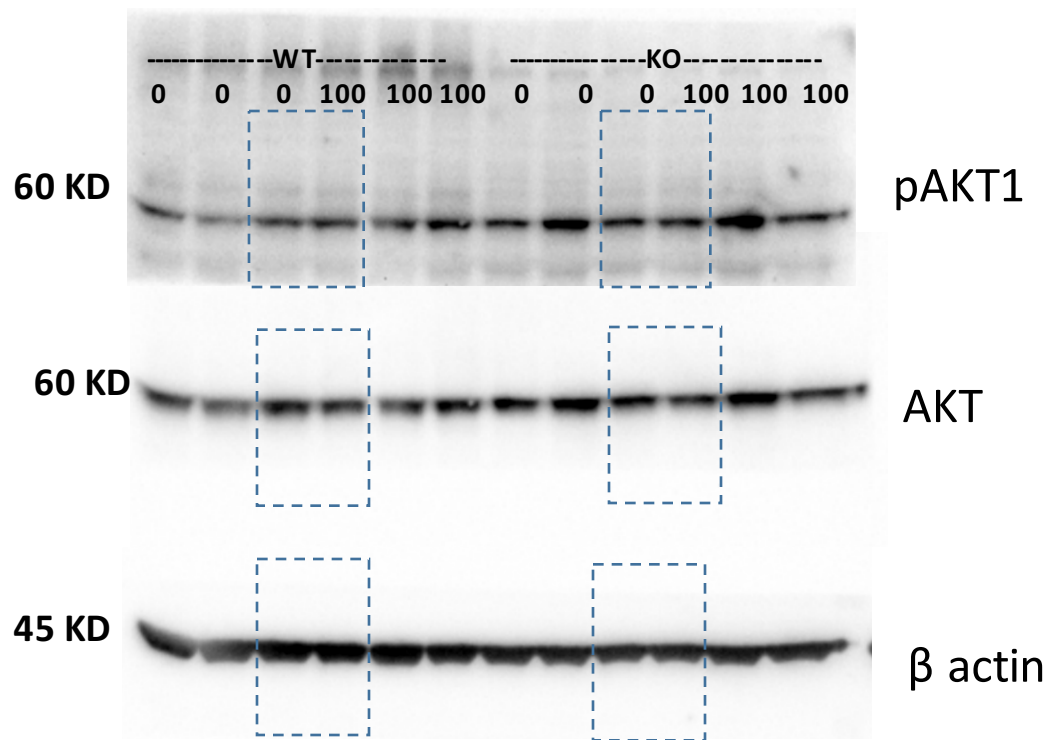

**d** 4F, Panels 1-4

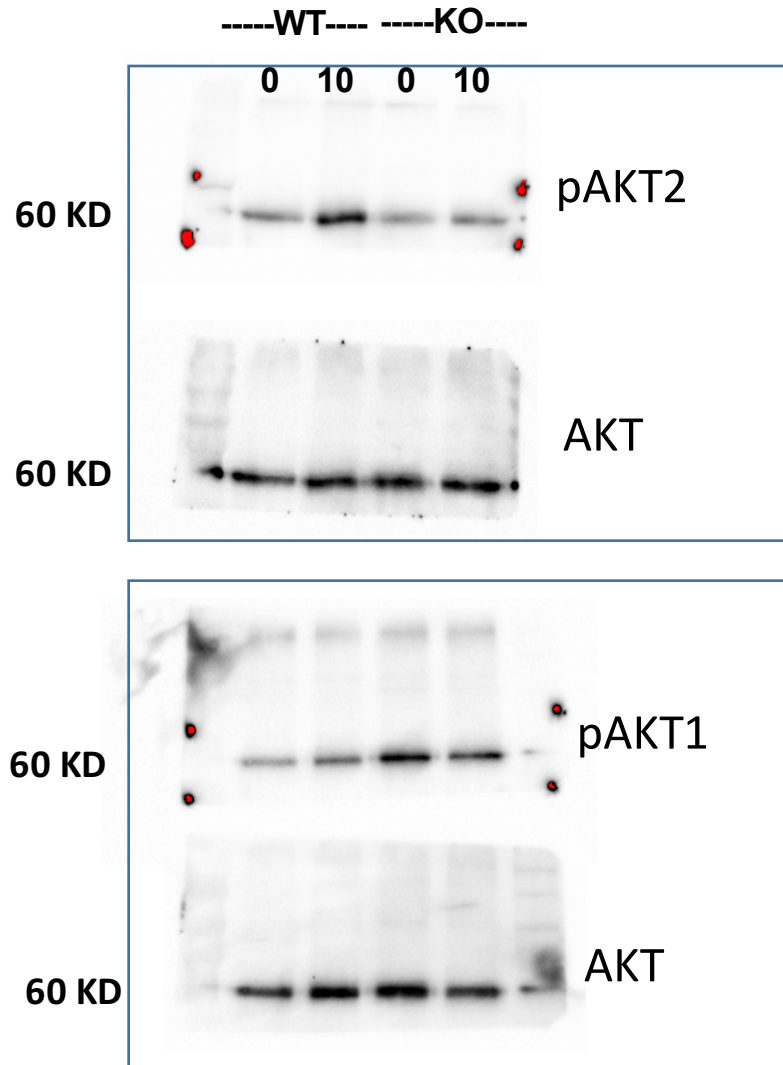

**e** 4F, Panels 5-6

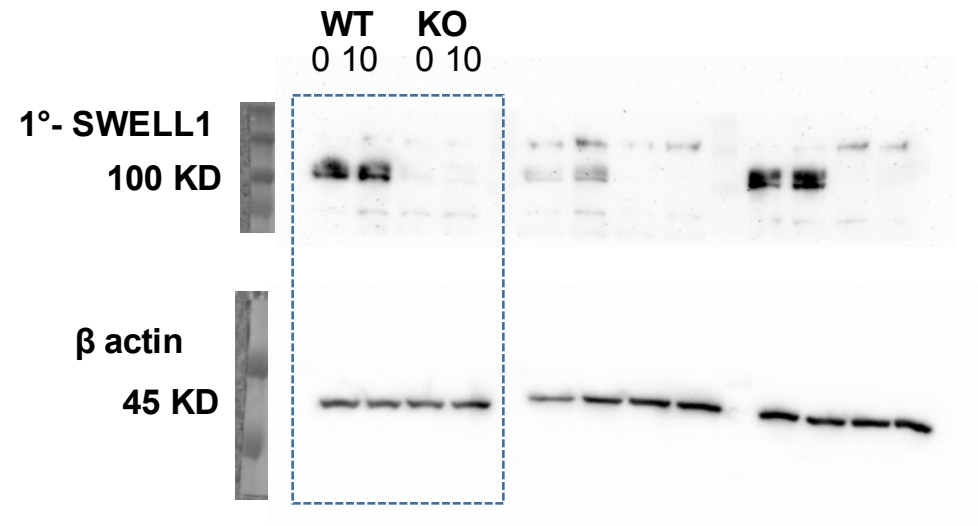

**same lysates,  
Separate gel**

**f 4G, Top Panel**

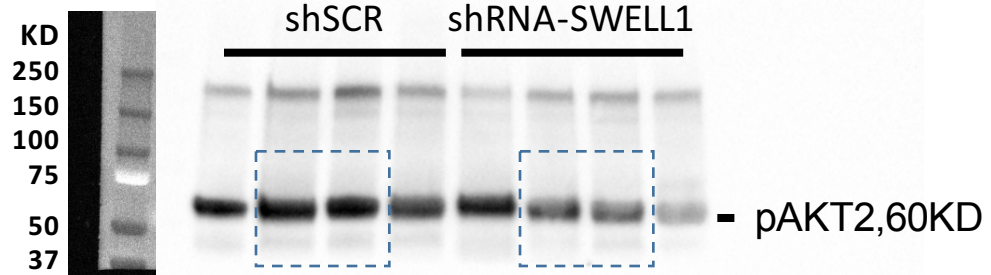

**g 4G, Bottom Panel**

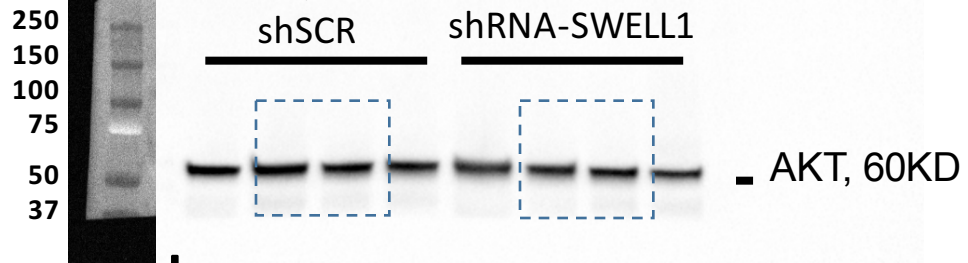

**h 4G, Middle Panel**

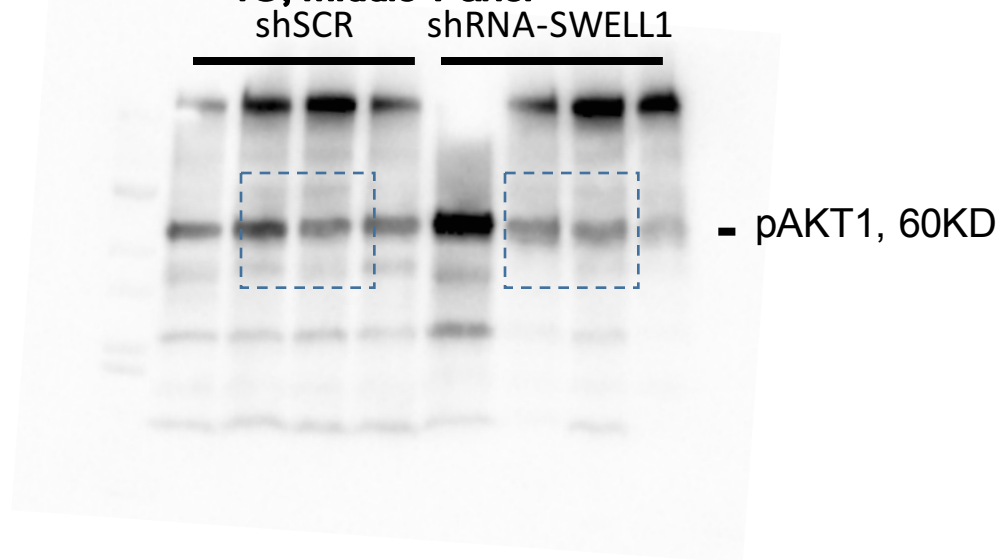



**n** 4I, Top Panel

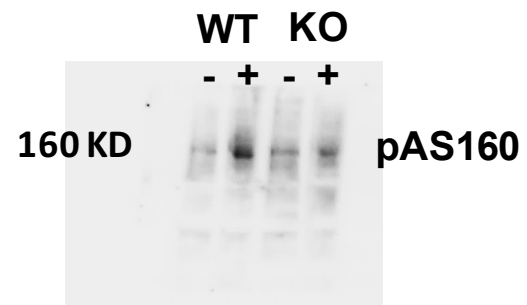

**o** 4I, Middle and Bottom Panels

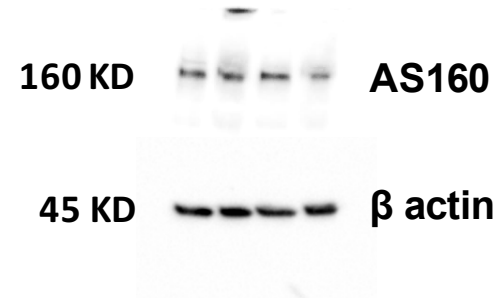





**q**

**5A, Top Panel**

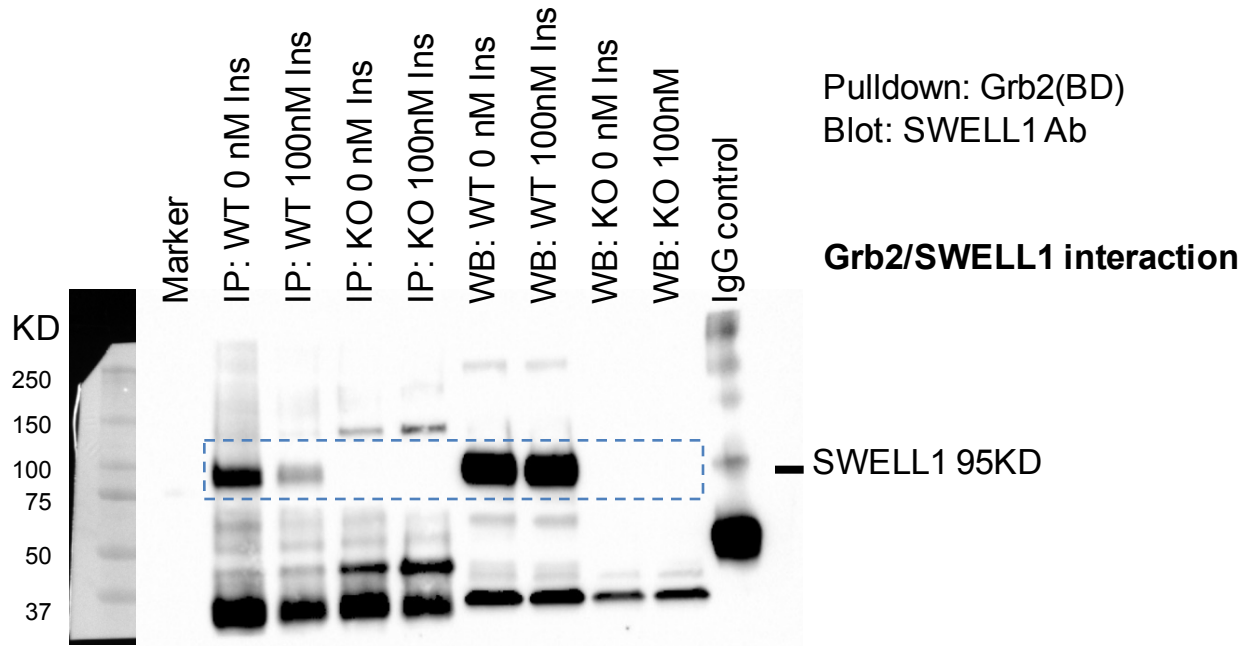

**r**

**5A, Bottom Panel**

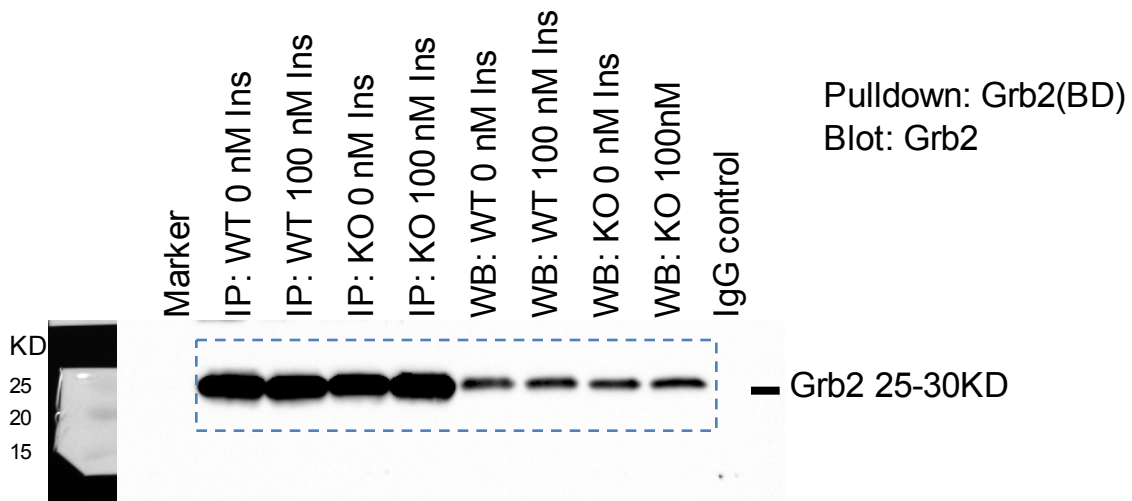

**S** 5A, Middle Panel, long exposure

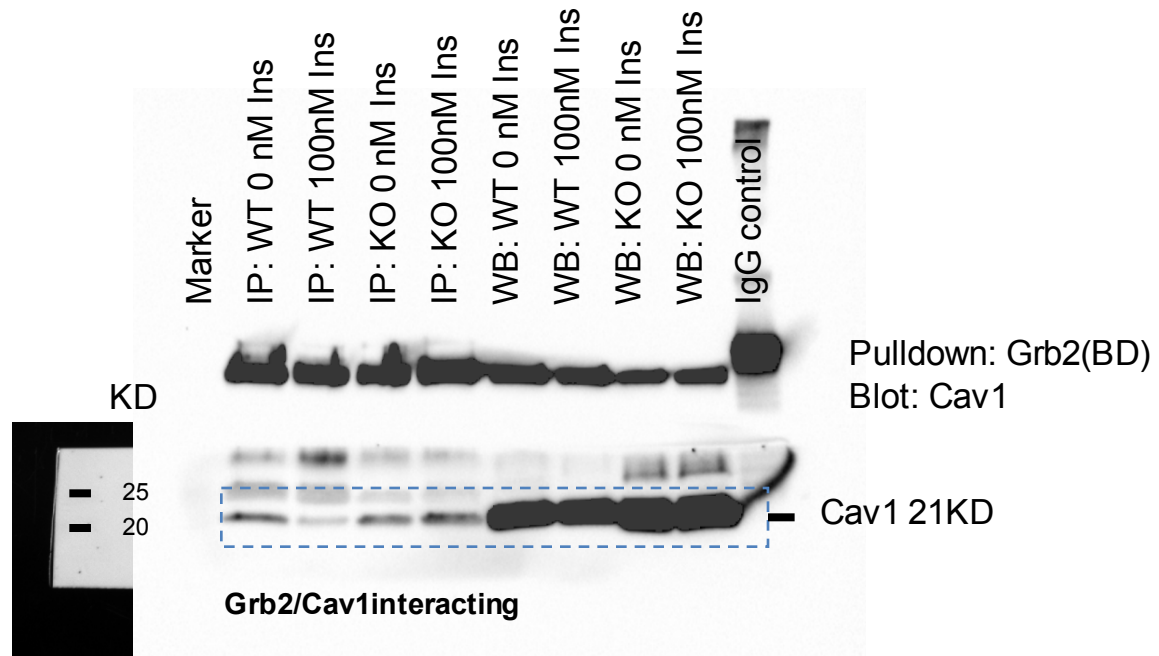

**t** 5A, Middle Panel, short exposure

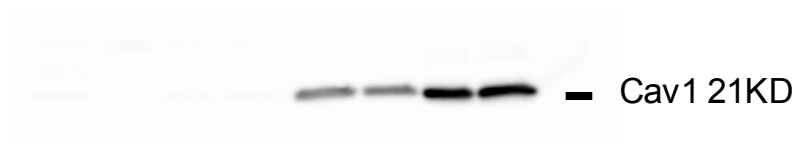

**u****5B, Top Panel, long exposure**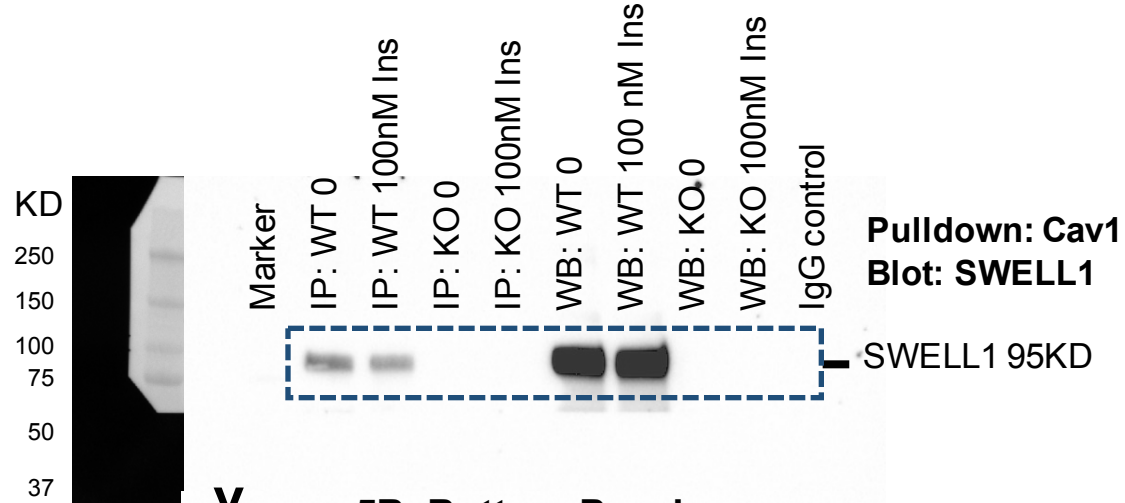**5B, Top Panel, short exposure**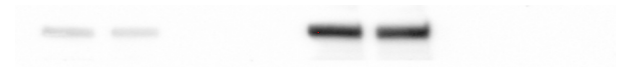**v****5B, Bottom Panel**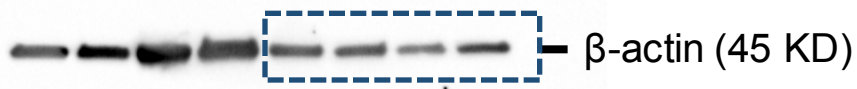**w****5B, Middle Panel**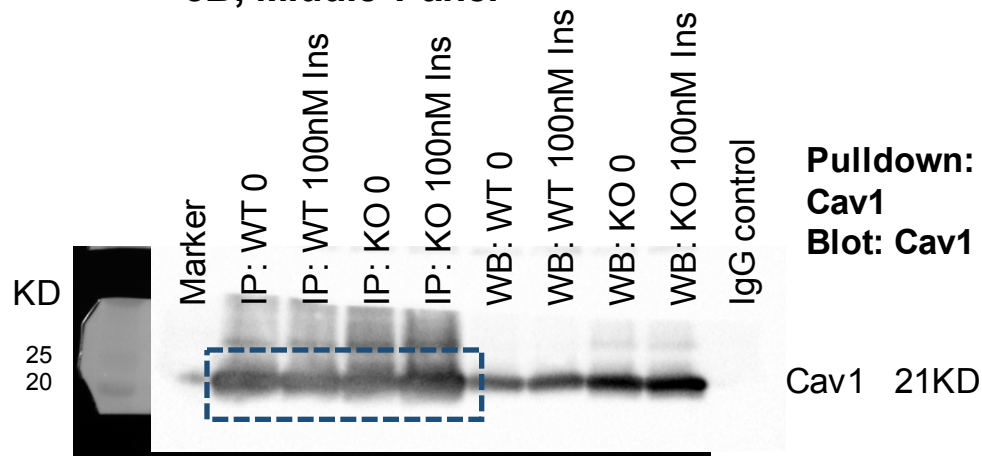

**X****5E, Top Panel, Short Exposure**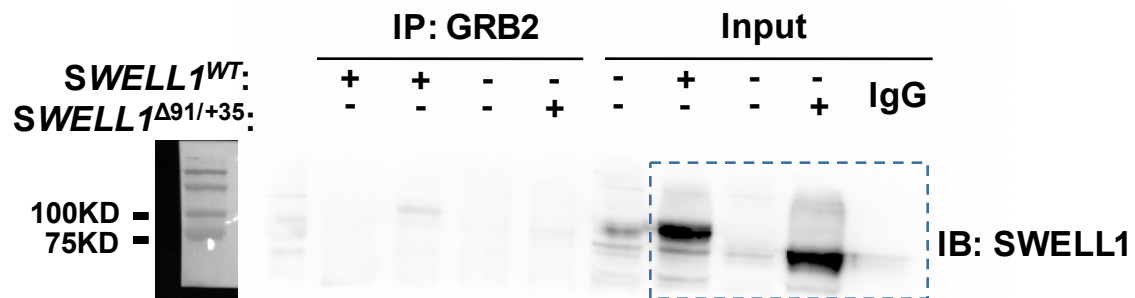**y****5E, Top Panel, Long Exposure**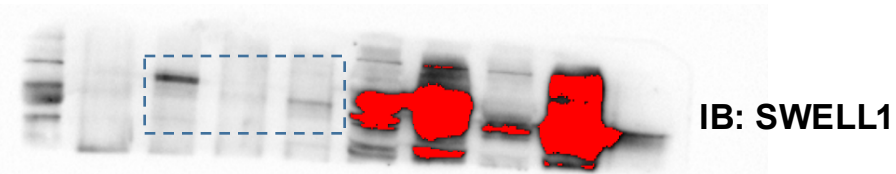**z****5E, Middle and bottom panels**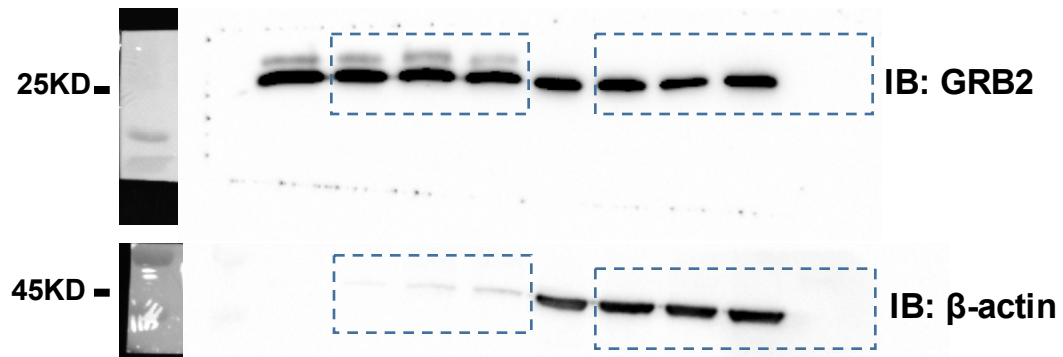



**ab**

**7A**

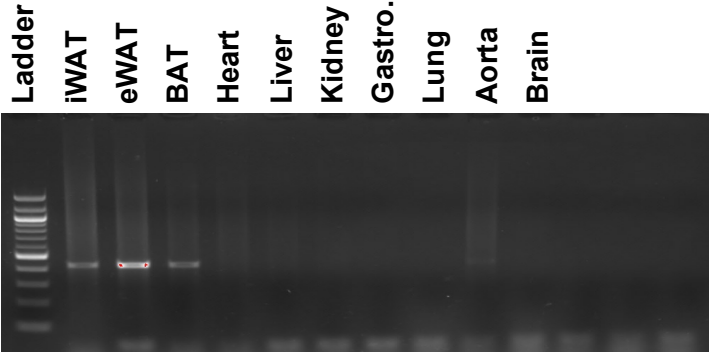

**ac**

**Supplementary 1B, Top and bottom panels**

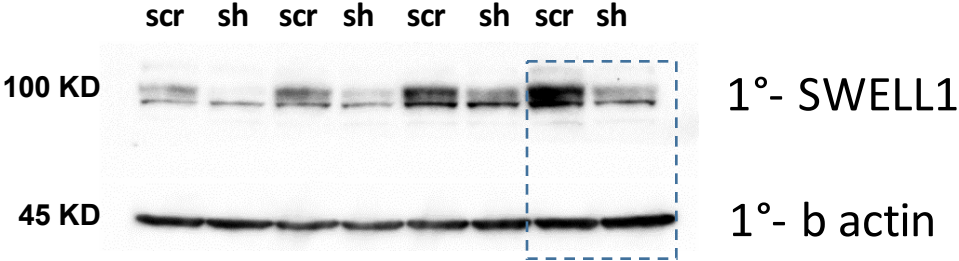

**ad**

**Supplementary 1C**

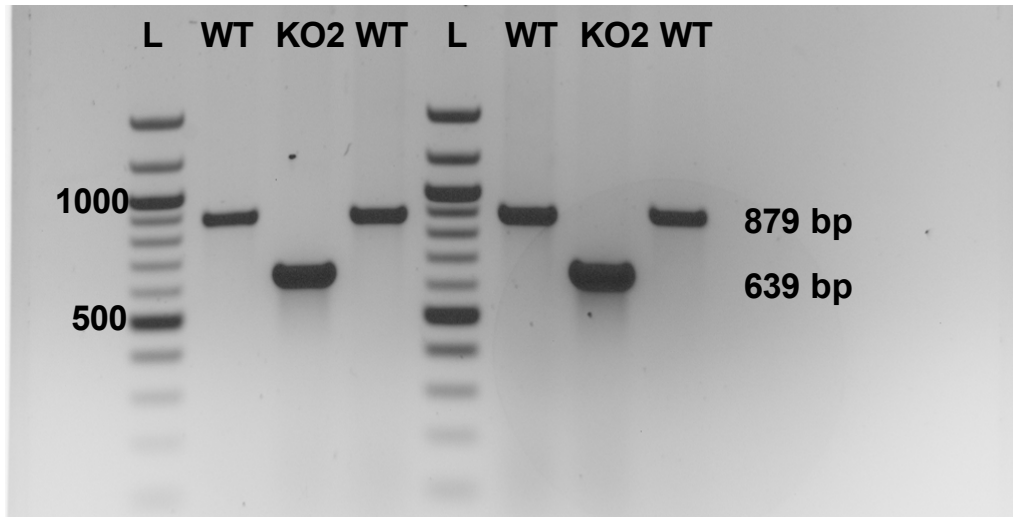

**ae**

**Supplementary 2E**

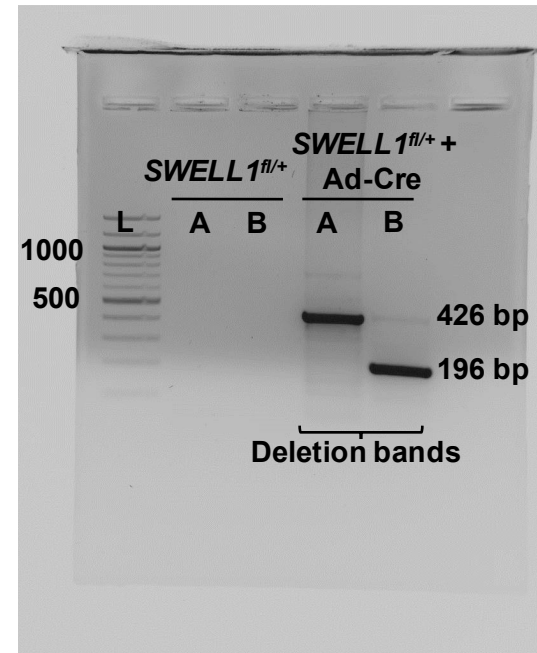

**af** Supplementary 5A,  
Top and bottom panels

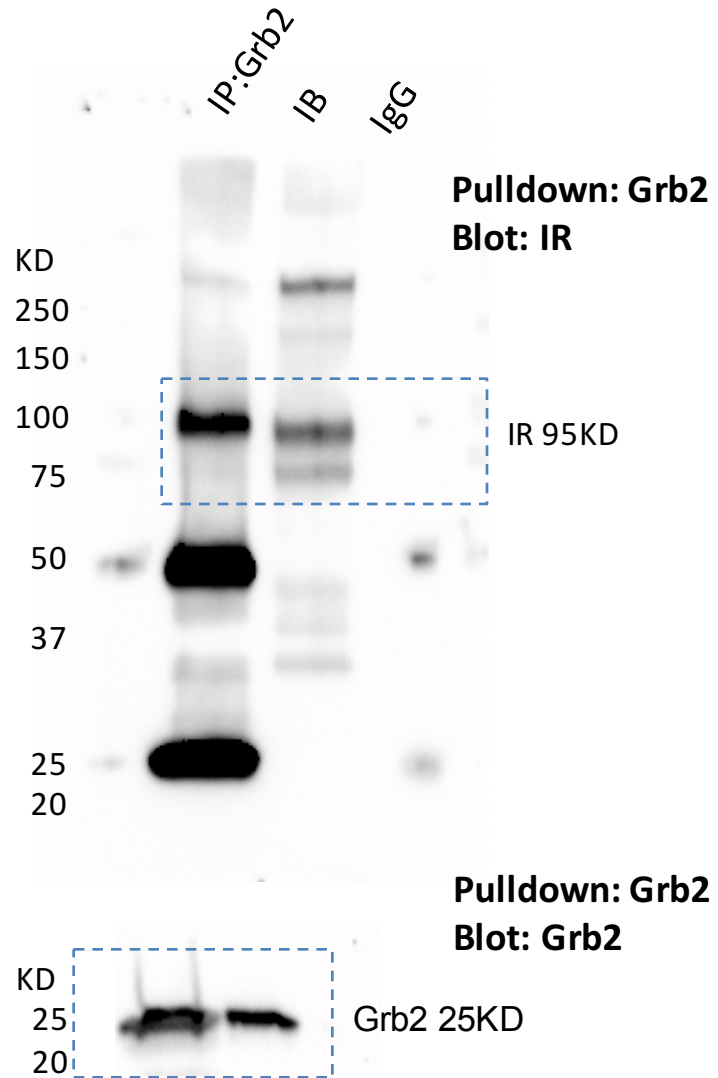

**ag** Supplementary 5B,  
Top and bottom panels

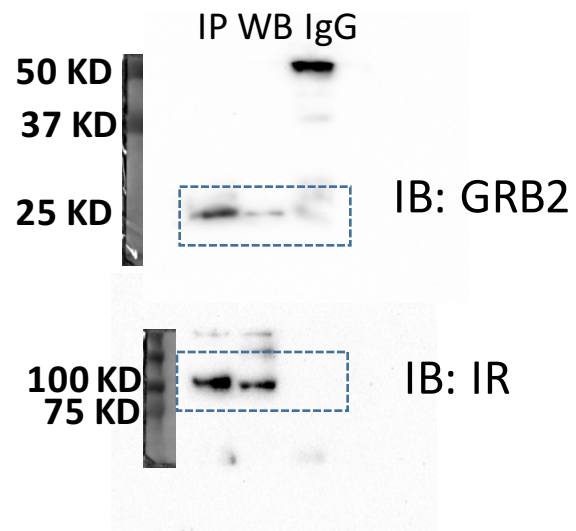



ah

Supplementary 5C, Top and bottom panels

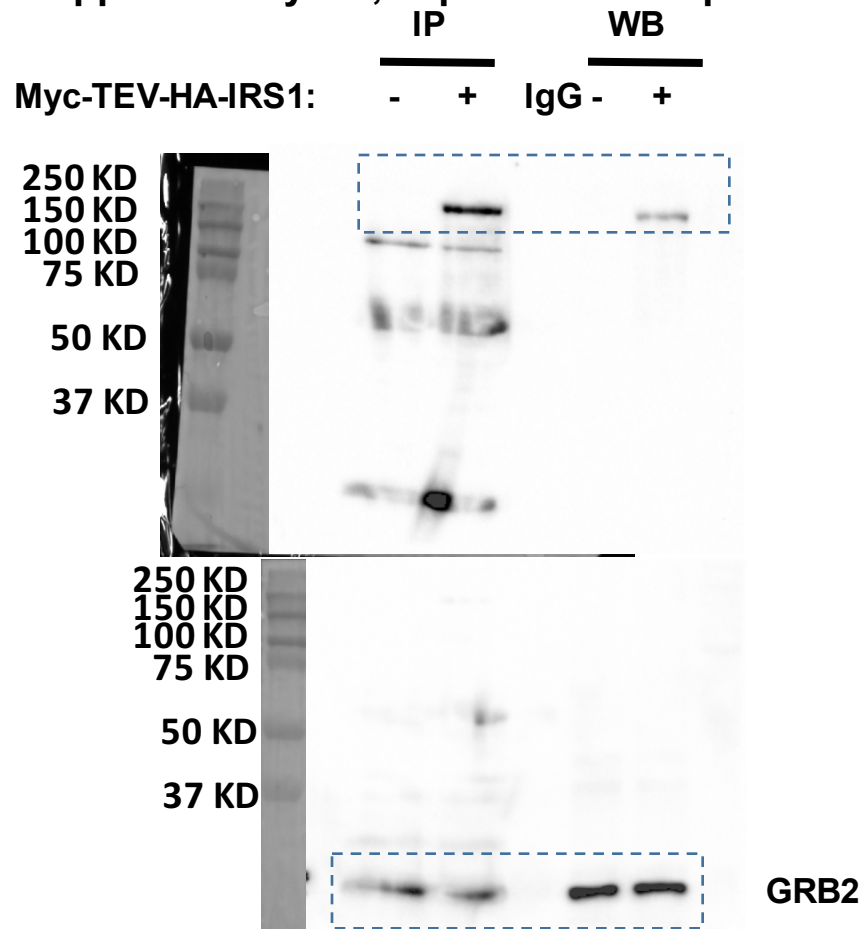

Supplement: NIHMS861029-supplement-10.pdf [file NIHMS861029-supplement-10.pdf]
