# Supplementary material
Source: PubMed Central journal article supplement (PMC5415409)

## Supplementary Fig 2

**a** WT 5' CGGAGACGGGCGTACTGGACAAGAAGGAAGGGGAGCAGG 3'

KO1 CGGAGACGGGCG -ACTGGACAAGAAGGAAGGGGAGCAGG -1 bp  
 CGGAGACGGG ----- ACAAGAAGGAAGGGGAGCAGG -8 bp

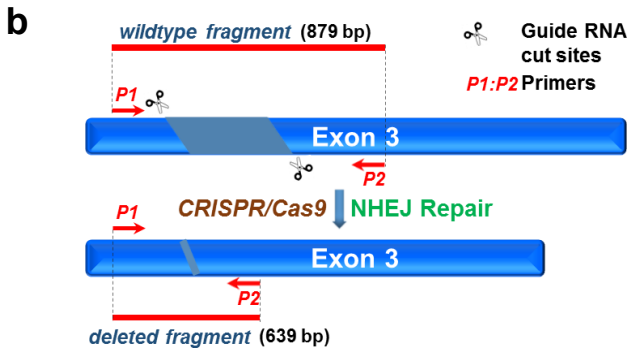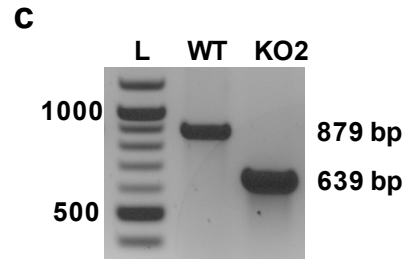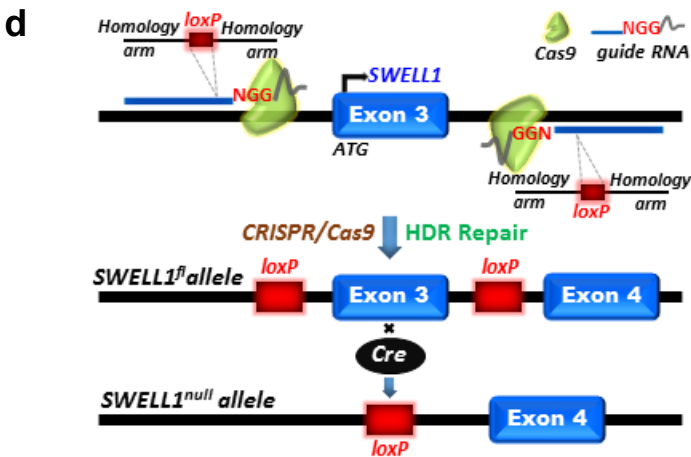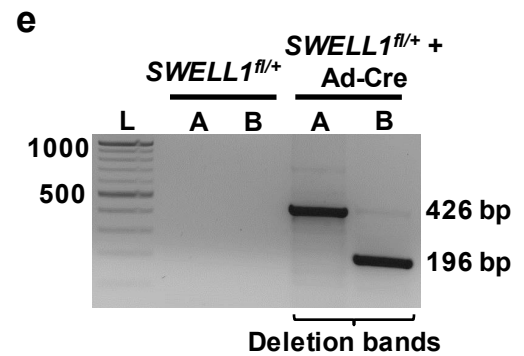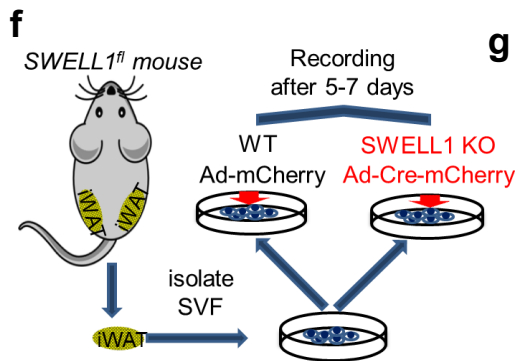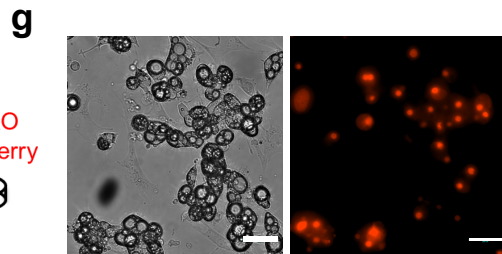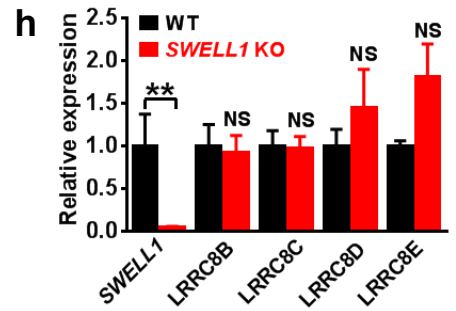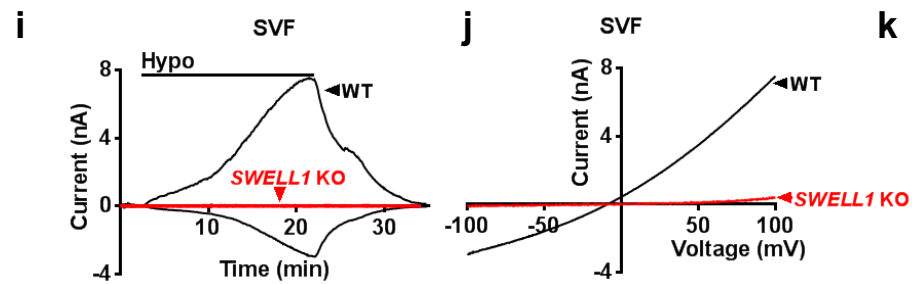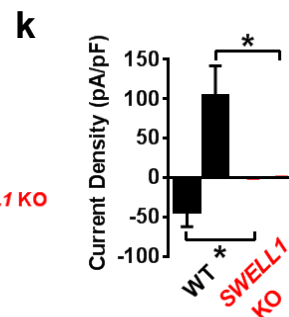

Supplement: NIHMS861029-supplement-3.pdf [file NIHMS861029-supplement-3.pdf]
