# Supplementary material
Source: PubMed Central journal article supplement (PMC5415409)

# Supplementary Fig 1

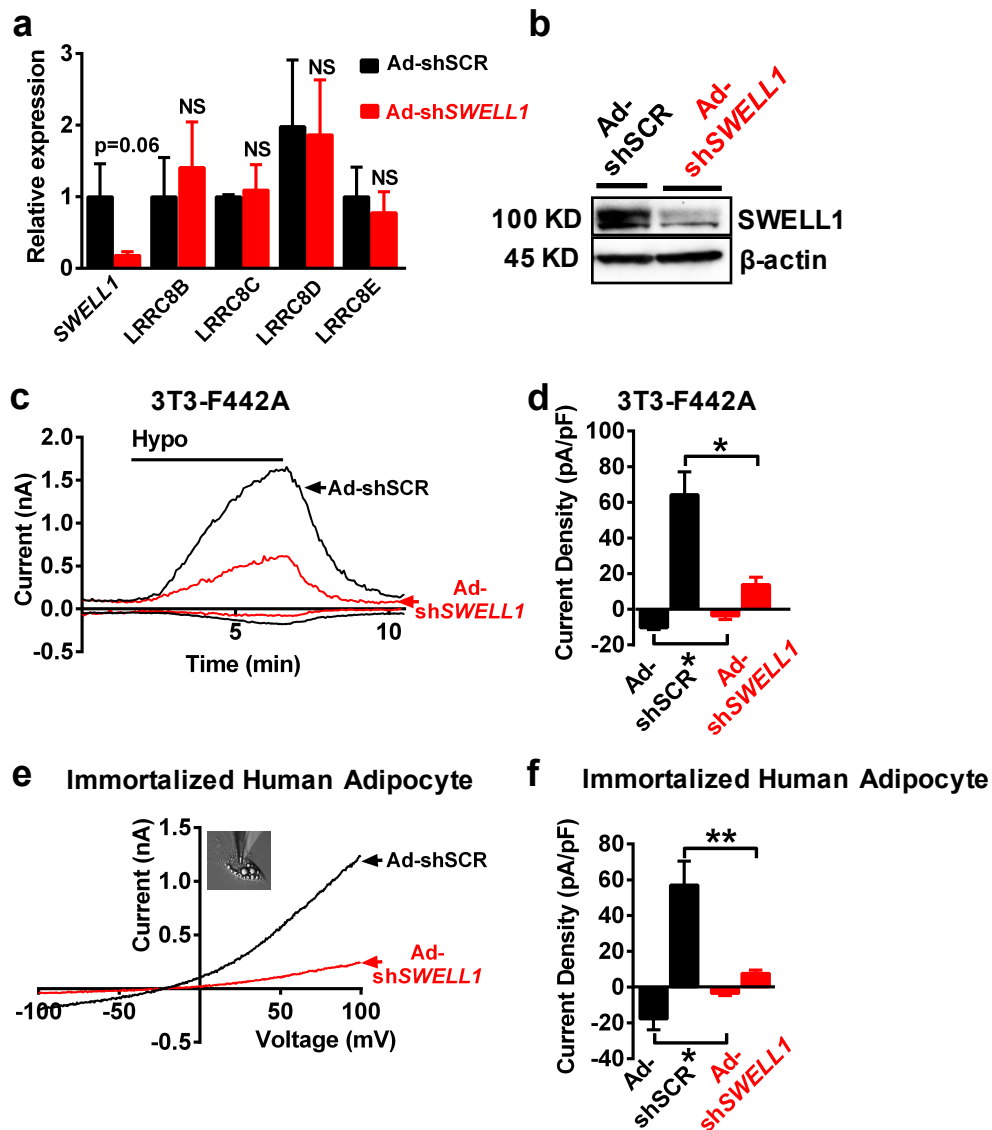

Supplement: NIHMS861029-supplement-2.pdf [file NIHMS861029-supplement-2.pdf]

## Supplementary Fig 3

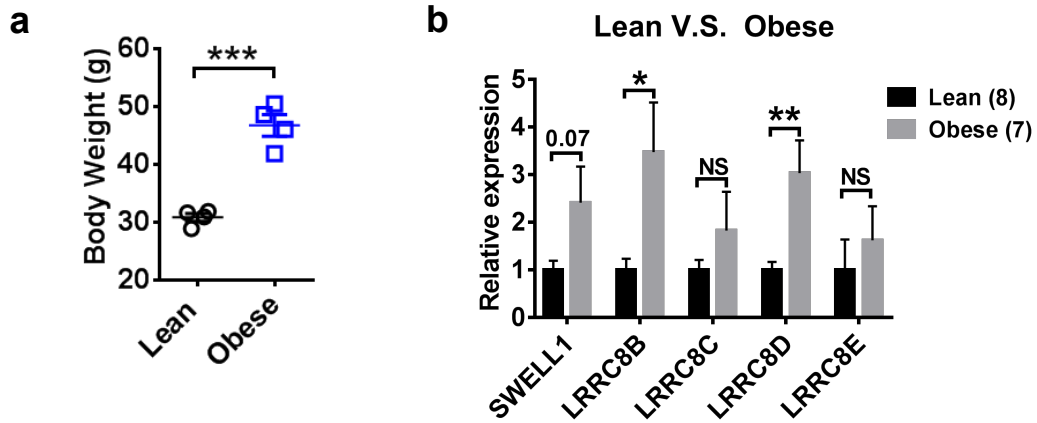

**c**

| BMI > 30 |     |        |       |
|----------|-----|--------|-------|
| No.      | Age | Gender | BMI   |
| 1        | 38  | Female | 55.10 |
| 2        | 65  | Female | 32.02 |
| 3        | 51  | Female | 48.8  |
| BMI < 30 |     |        |       |
| No.      | Age | Gender | BMI   |
| 1        | 52  | Male   | 27.56 |
| 2        | 61  | Female | 28.36 |

Supplement: NIHMS861029-supplement-4.pdf [file NIHMS861029-supplement-4.pdf]

# Supplementary Fig 4

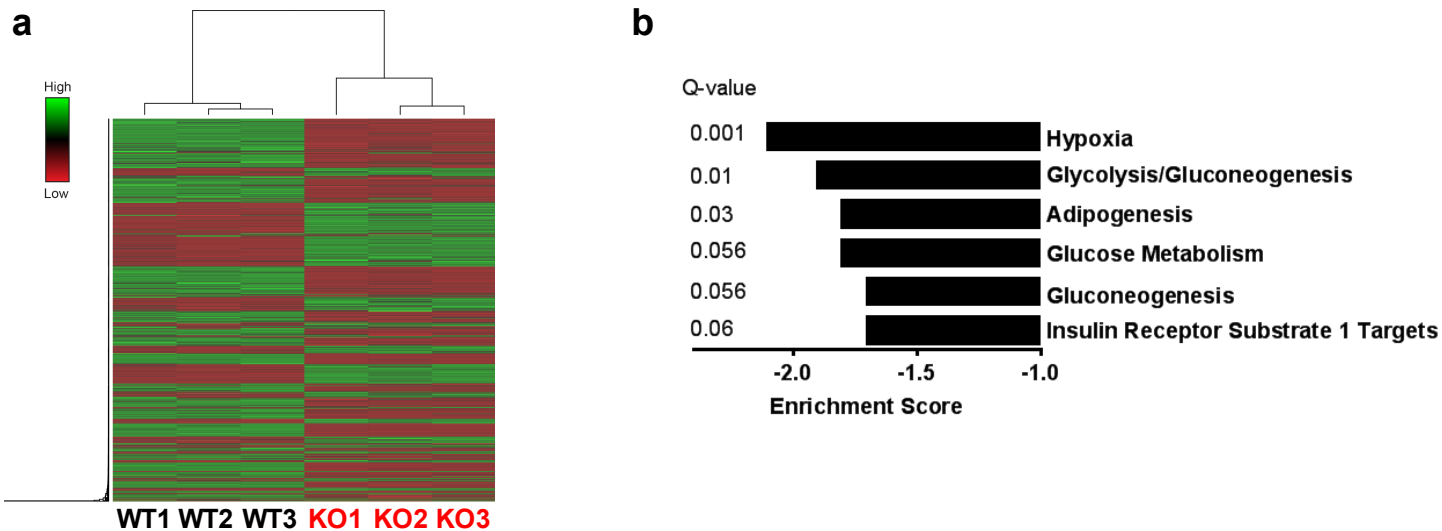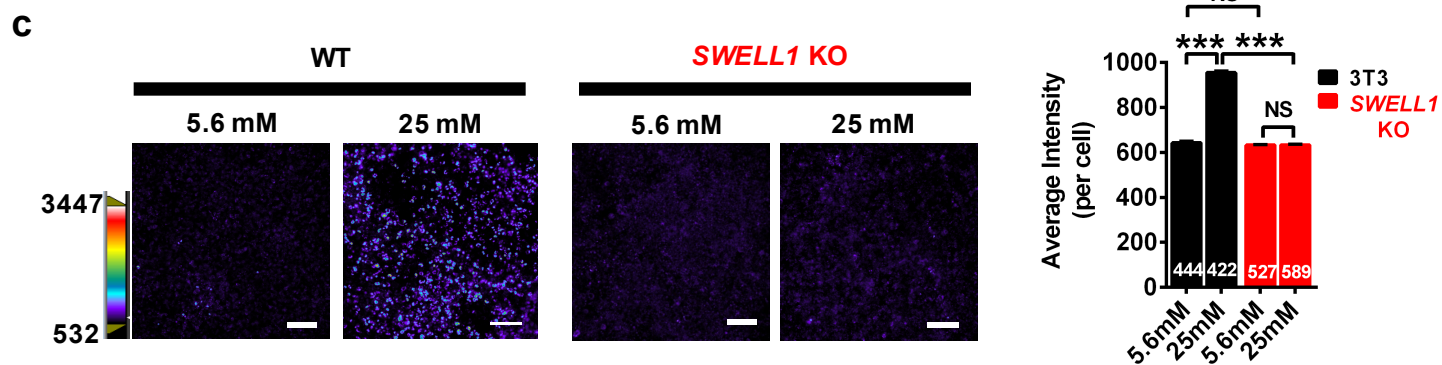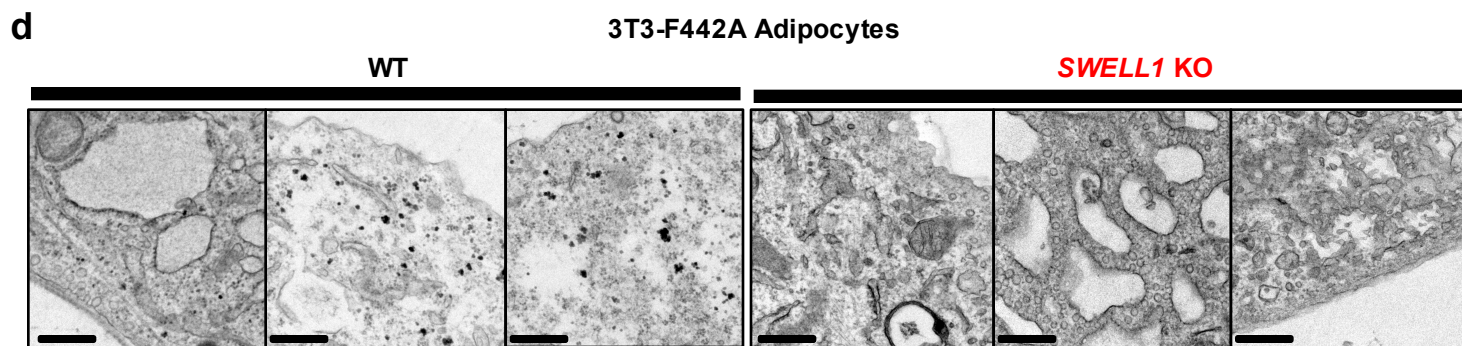

Supplement: NIHMS861029-supplement-5.pdf [file NIHMS861029-supplement-5.pdf]

## Supplementary Fig 5

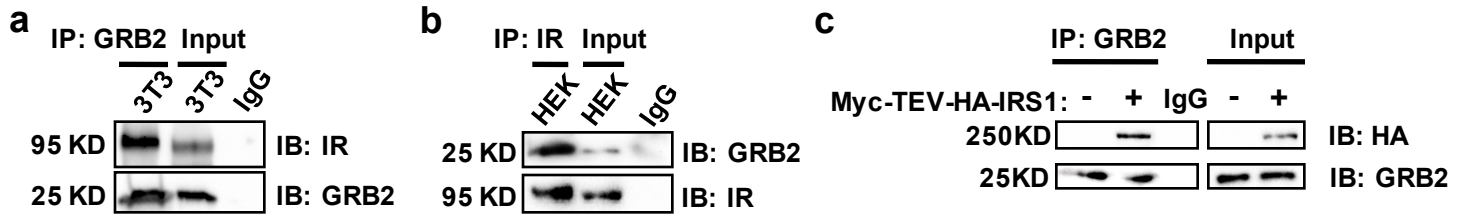

Supplement: NIHMS861029-supplement-6.pdf [file NIHMS861029-supplement-6.pdf]

# Supplementary Fig 6

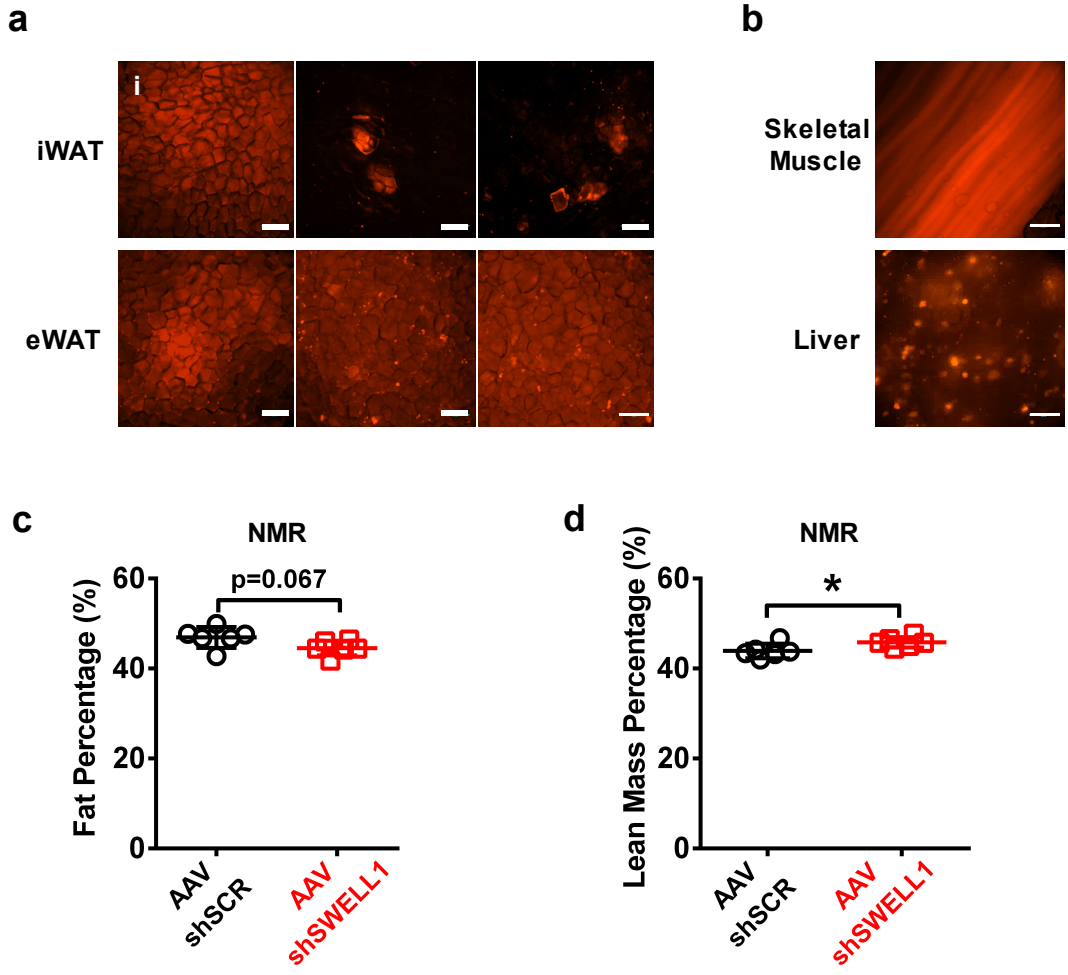

Supplement: NIHMS861029-supplement-7.pdf [file NIHMS861029-supplement-7.pdf]

Supplementary Fig 7

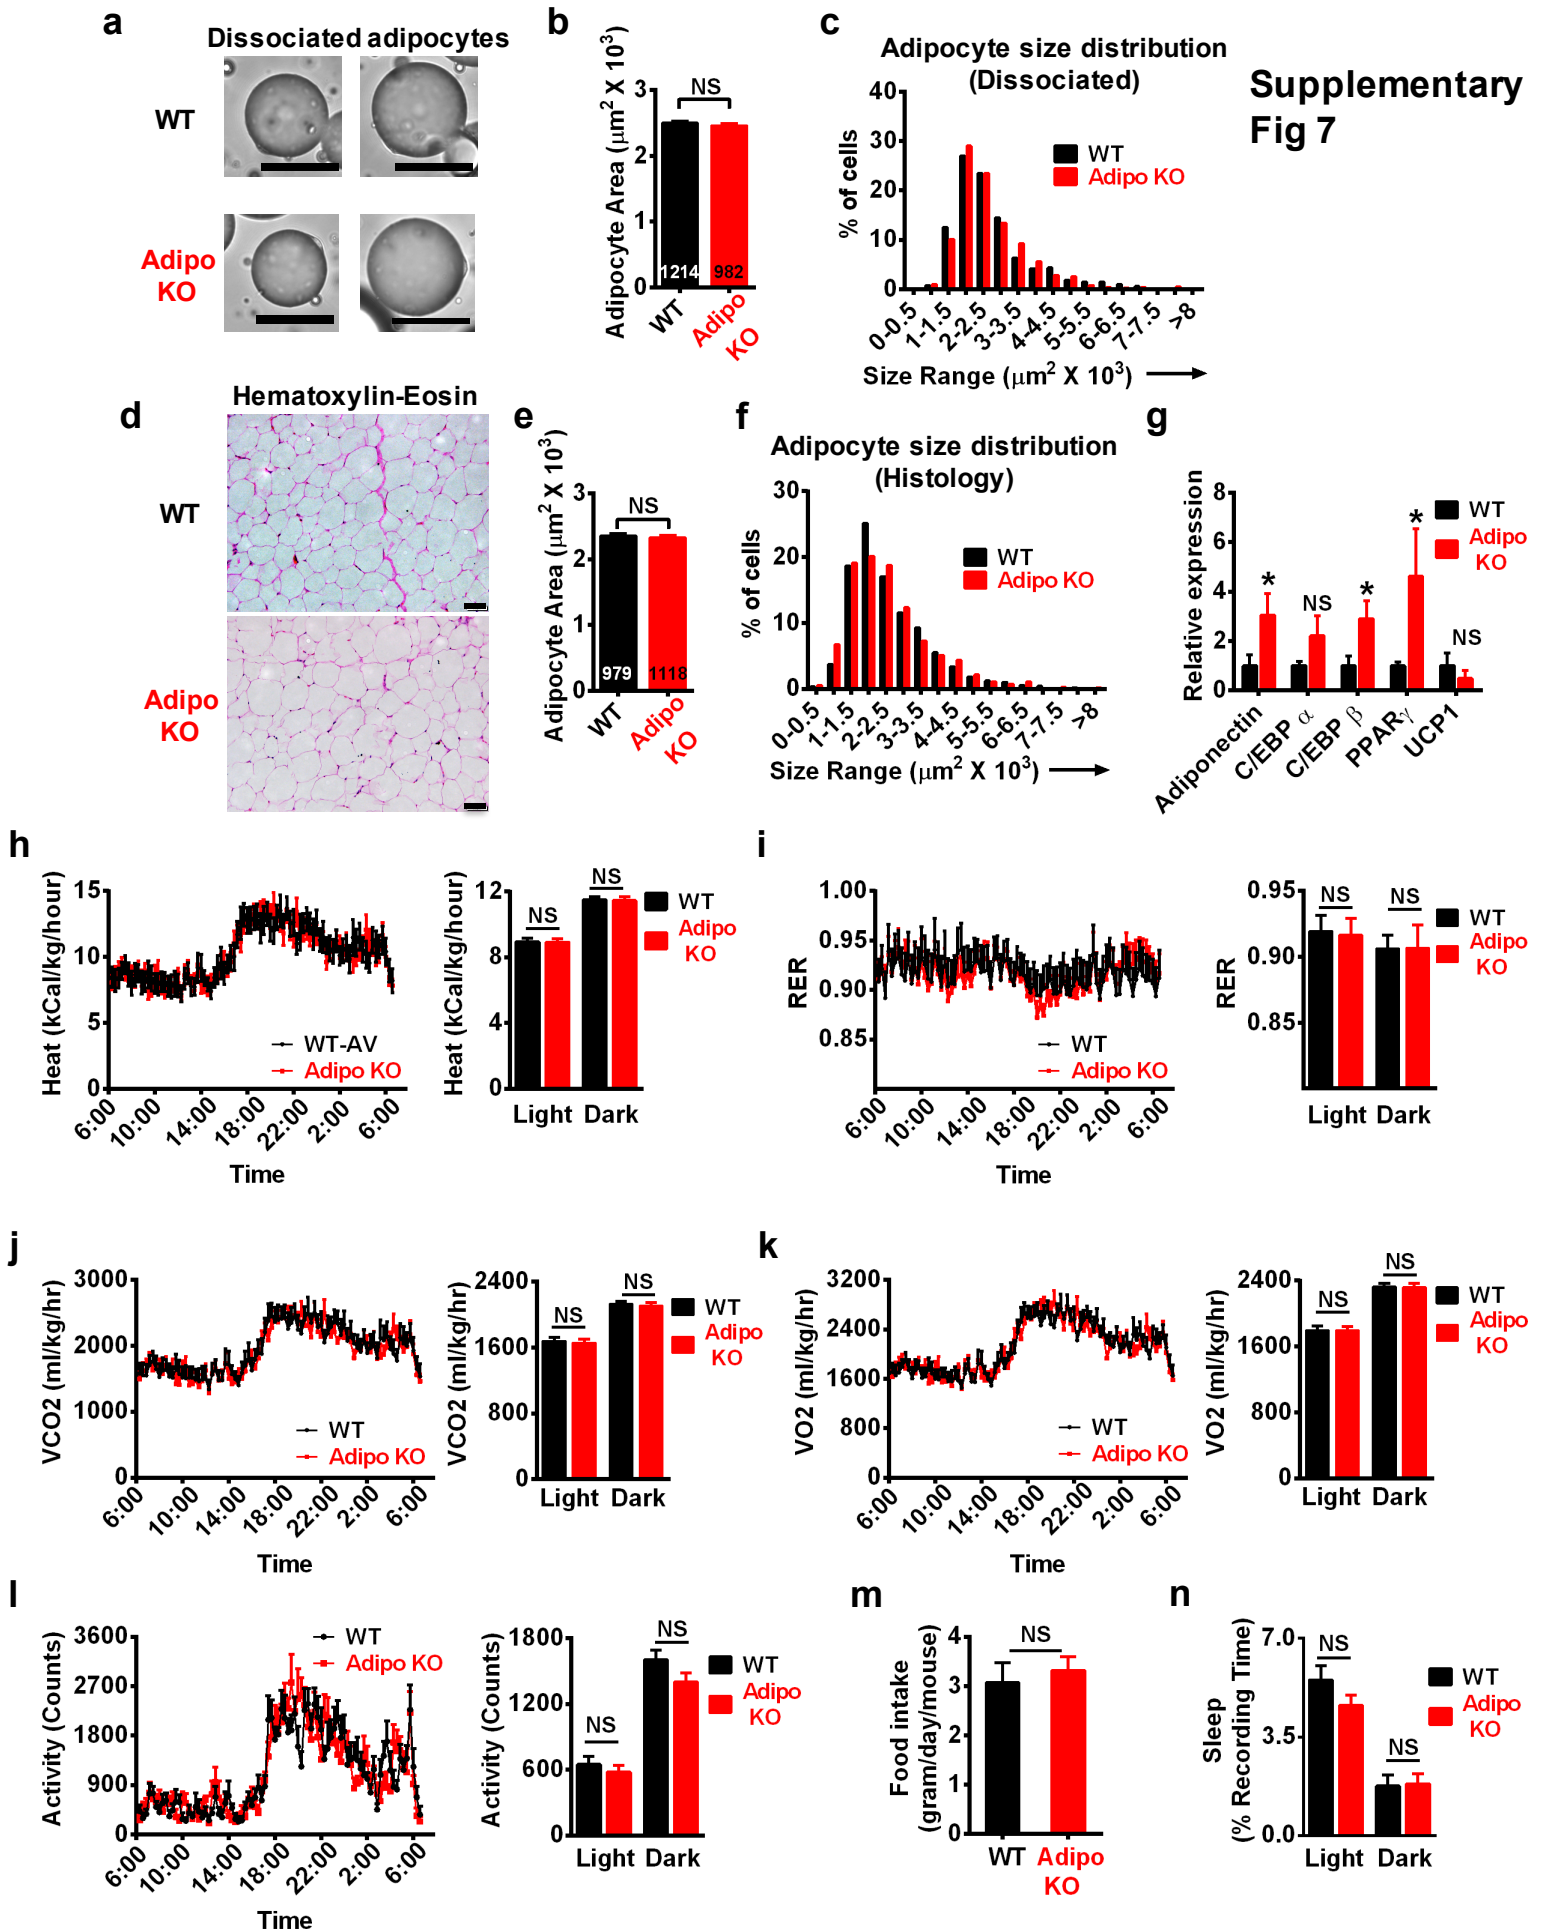

Supplement: NIHMS861029-supplement-8.pdf [file NIHMS861029-supplement-8.pdf]

# Supplementary Fig 8

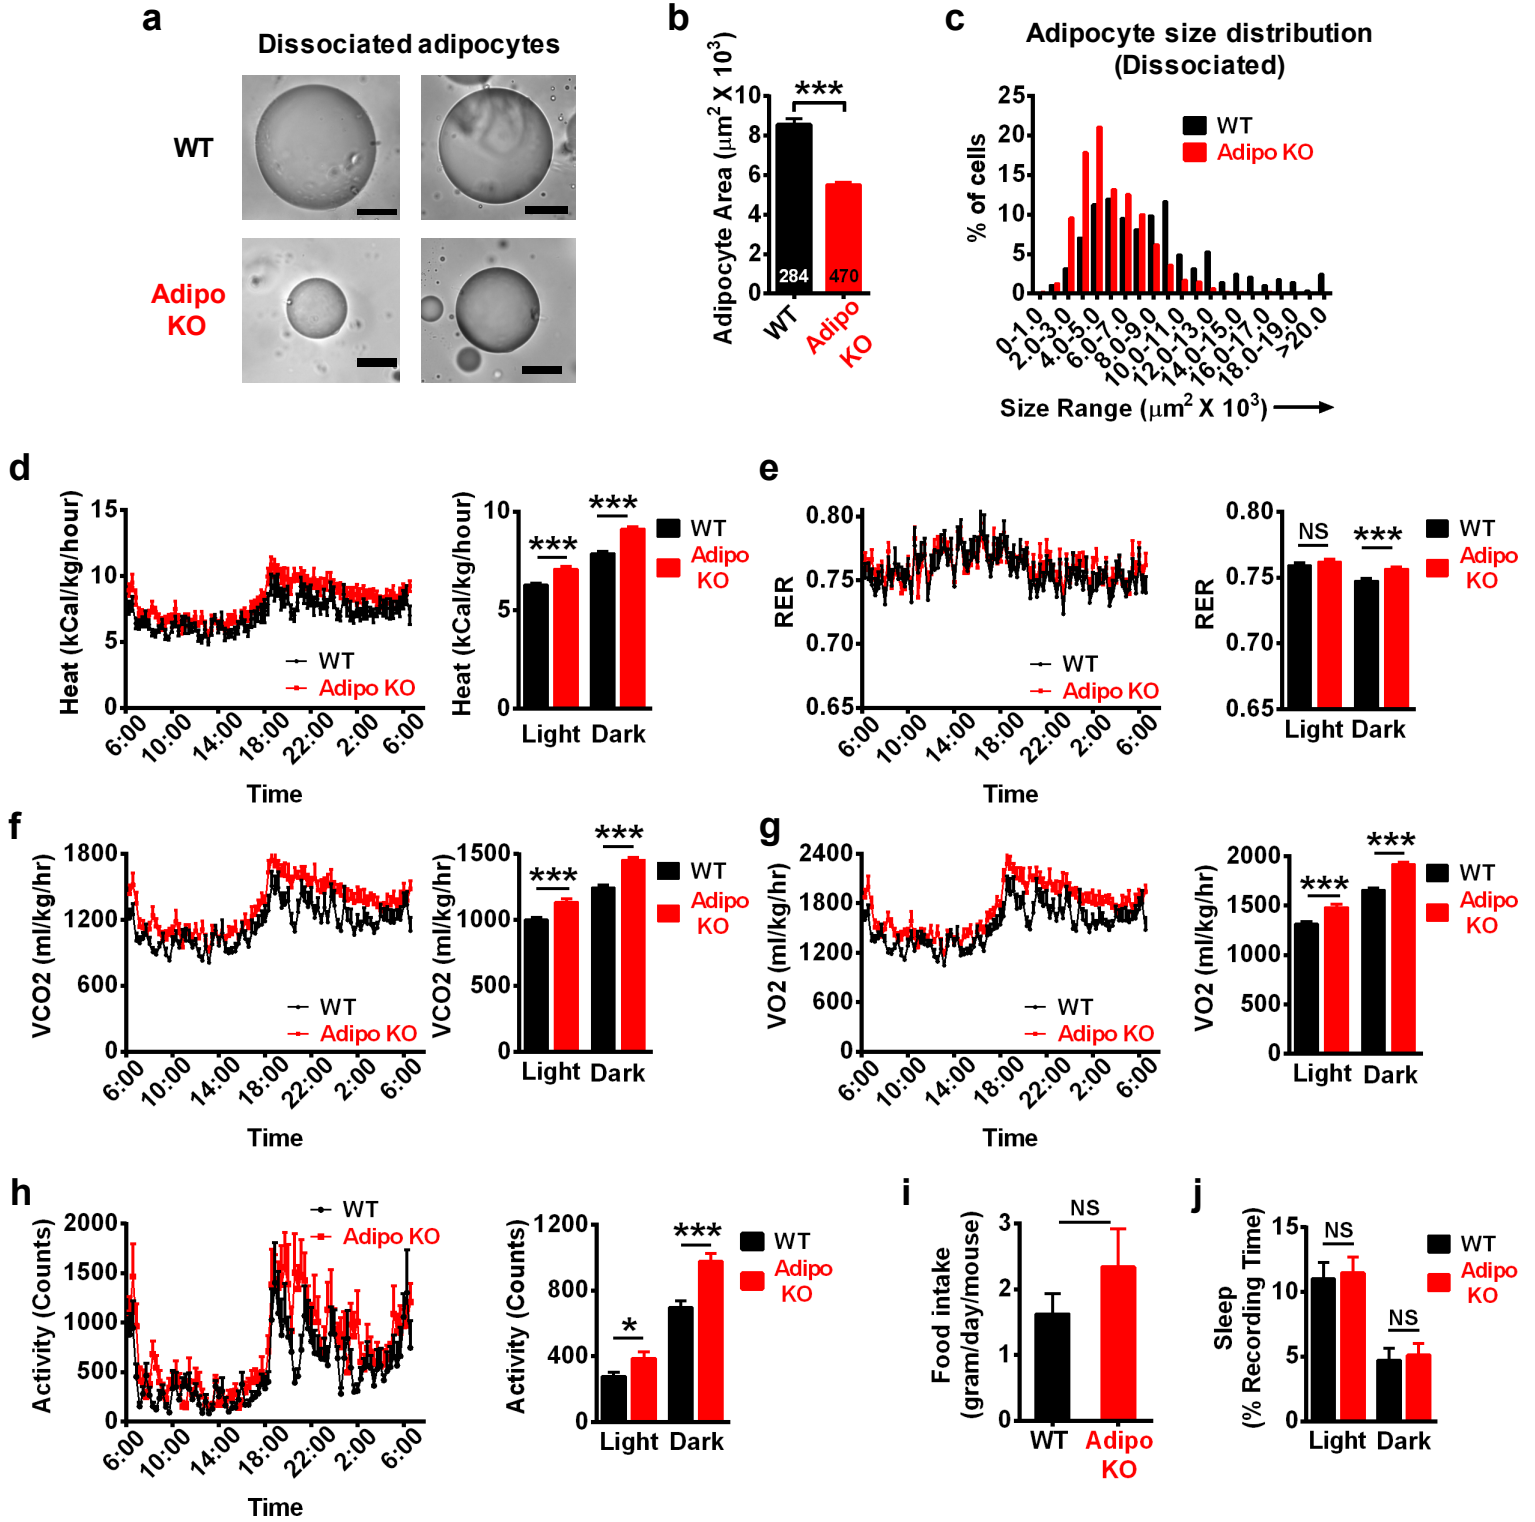

Supplement: NIHMS861029-supplement-9.pdf [file NIHMS861029-supplement-9.pdf]
